# Supplementary material for: Polypeptide micelles with dual pH activatable dyes for sensing cells and cancer imaging
Source: Royal Society of Chemistry journal article supplement (doi:10.1039/c4nr00519h), 2014-01-01
Supplement: c4nr00519h1.pdf [file c4nr00519h1.pdf]

## Supplementary Materials

### Polypeptide micelles with dual pH activable dyes for sensing cells and cancer imaging

Ping Gong<sup>†</sup>, Yueting Yang<sup>†</sup>, Huqiang Yi, Shengtao Fang, Pengfei Zhang, Zonghai Sheng, Guanhui Gao, Duyang Gao, and Lintao Cai\*

Guangdong Key Laboratory of Nanomedicine, Shenzhen Key Laboratory of Cancer Nanotechnology, Institute of Biomedicine and Biotechnology, Shenzhen Institutes of Advanced Technology, Chinese Academy of Sciences, Shenzhen 518055, PR China.

**Corresponding author:** Shenzhen Institutes of Advanced Technology, Chinese Academy of Science, Shenzhen 518055, China.

**Address correspondence:** Tel: 86-755-86392210; Fax: 86-755-86392299; E-mail: lt.cai@siat.ac.cn (Lintao Cai).

#### Characterization of the Molecular Weight of PEG-PLL-PLLeu

The apparent molecular weight and polydispersity of each PEG-PLL-PLLeu was determined by gel permeation chromatography (VE2001 GPCmax, Malven Company) at 40°C and 2xPLgel 5µm MIXED-C 300x7.5mm column was used. Freeze-dried samples were dissolved in DMF and filtered on 0.45 µm filters, before being injected in the apparatus. A calibration based on polyethylene glycol (PEG) standards ( $K=14.1 \times 10^{-5}$  dL/g and  $\alpha=0.7$  at 40°C. in DMF) was employed on order to calculate the molecular weight from times of elution measured by the instrument. Flow rate was 1.0 mL/min, concentration of sample was 3.0-4.0 mg/mL and injection volume was 200 uL.

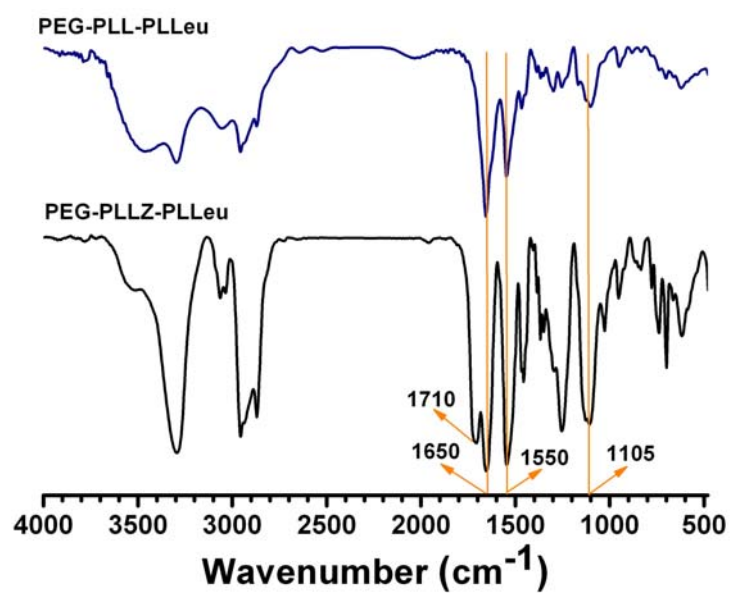

**Fig. S1.** FT-IR spectrum of PEG-PLLZ-PLLeu and PEG-PLL-PLLeu copolymers

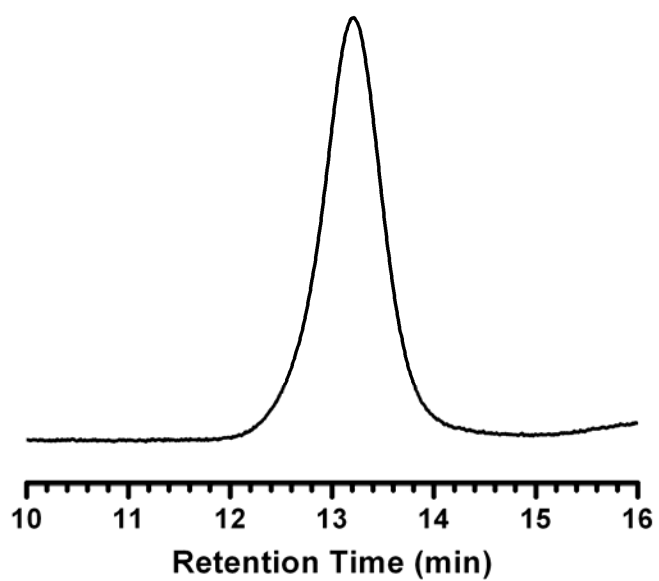

**Fig. S2.** Gel permeation chromatography (GPC) of PEG-PLL-PLLeu.

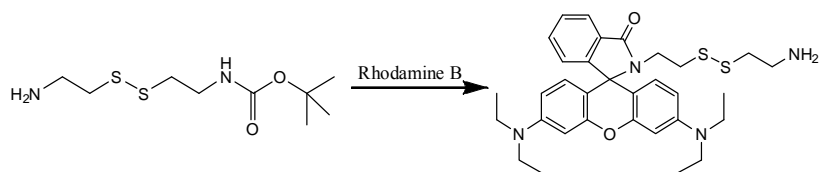

**Fig. S3.** Synthesis of rhodamine B-cystamine (RBLC)

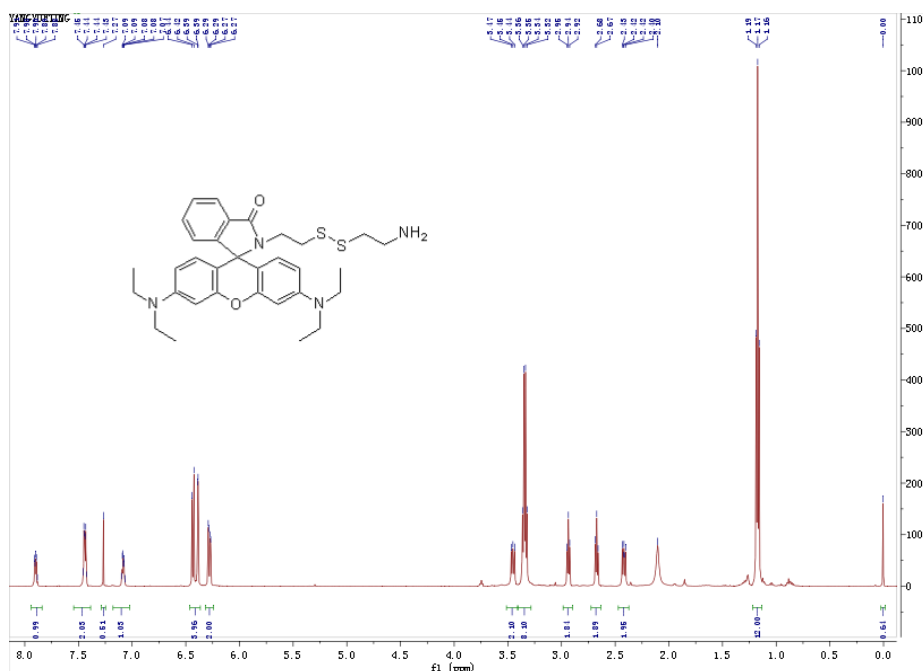

**Fig. S4.** Rhodamine B-cystamine (RBLC) was confirmed by HRMS. <sup>1</sup>H NMR (400 MHz, *d*<sub>6</sub>-DMSO, TMS)  $\delta$  1.17 (t, *J* = 7.05 Hz, 12H, CH<sub>3</sub>CH<sub>2</sub>), 2.42 (t, *J* = 8 Hz, 2H, CH<sub>2</sub>CH<sub>2</sub>S-), 2.67 (t, *J* = 6.05 Hz, 2H, -SCH<sub>2</sub>CH<sub>2</sub>), 2.94 (t, *J* = 6.05 Hz, 2H, -SCH<sub>2</sub>CH<sub>2</sub>), 3.34 (q, *J* = 7.05 Hz, 8H, CH<sub>3</sub>CH<sub>2</sub>), 3.45 (t, *J* = 8 Hz, 2H, CH<sub>2</sub>CH<sub>2</sub>S-), 6.28 (dd, *J* = 8.9 Hz, 2.5 Hz, 2H, Xanthene-*H*), 6.39 (d, *J* = 2.5 Hz, 2H, Xanthene-*H*), 6.43 (d, *J* = 8.85 Hz, 2H, Xanthene-*H*), 7.07-7.10 (m, 1H, Ar-*H*), 7.41-7.47 (m, 2H, Ar-*H*), 7.88-7.91 (m, 1H, Ar-*H*).

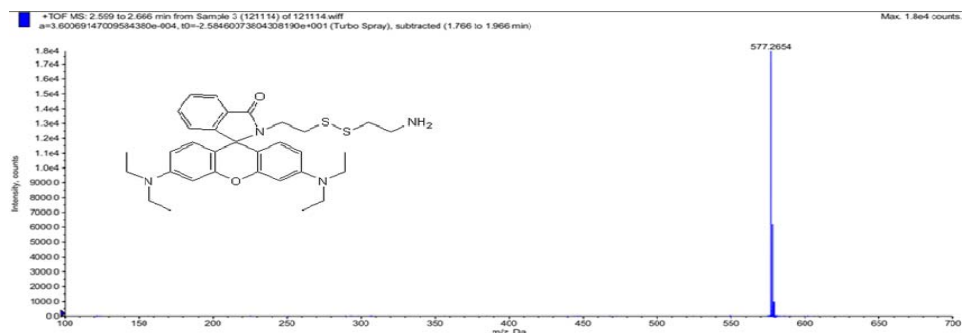

**Fig. S5.** Mass spectrum of RBLC. HRMS (EI)  $m/z$   $C_{32}H_{39}N_4O_2S_2^+$  ( $M^+$ ): 577.2666. Found 577.2654.

Table S1. Encapsulation efficiency (EE) and drug loading efficiency (LE) of RBLC

| PEG-PLL-PLLeu-FITC/RBLC<br>ratio | feed molar | EE of RBLC (%) | LE of RBLC (%) |
|----------------------------------|------------|----------------|----------------|
| 13.5                             |            | 66.5           | 4.7            |
| 5.4                              |            | 53.4           | 8.9            |
